# Supplementary material for: A Comparison of 7 Tesla MR Spectroscopic Imaging and 3 Tesla MR Fingerprinting for Tumor Localization in Glioma Patients
Source: MDPI journal article supplement (doi:10.3390/cancers16050943), 2024-02-26
Supplement: s1 [file s1]

**A Comparison of 7T MRSI and 3T MRF for Tumor Localization in Glioma Patients**  
*Supplementary Material*

**Table S1.** Cohort overlap with previous publications [6,7].

| <b>Cohort Overlap</b> |                    |                    |
|-----------------------|--------------------|--------------------|
| <b>Patient ID</b>     |                    |                    |
| <b>This Study</b>     | <b>Hangel 2020</b> | <b>Hangel 2022</b> |
| 1                     | 3                  | -                  |
| 2                     | 4                  | 2                  |
| 3                     | 5                  | 3                  |
| 4                     | 6                  | 4                  |
| 5                     | -                  | 5                  |
| 6                     | 7                  | -                  |
| 7                     | -                  | 6                  |
| 8                     | 12                 | 8                  |
| 9                     | 17                 | -                  |
| 10                    | 20                 | 13                 |
| 11                    | -                  | 15                 |
| 12                    | -                  | 16                 |

**A Comparison of 7T MRSI and 3T MRF for Tumor Localization in Glioma Patients**  
*Supplementary Material*

**Table S2.** An overview according to the minimum reporting standards in MR spectroscopy [25].

| <b>Minimum Reporting Standards in MR Spectroscopy - Overview</b>                                                                                                                                                               |                                                                                                               |
|--------------------------------------------------------------------------------------------------------------------------------------------------------------------------------------------------------------------------------|---------------------------------------------------------------------------------------------------------------|
| <b>Site</b>                                                                                                                                                                                                                    | Vienna High Field MR Center                                                                                   |
| <b>1. Hardware</b>                                                                                                                                                                                                             |                                                                                                               |
| a. Field strength                                                                                                                                                                                                              | 7T                                                                                                            |
| b. Manufacturer                                                                                                                                                                                                                | Siemens                                                                                                       |
| c. Model                                                                                                                                                                                                                       | Magnetom                                                                                                      |
| d. RF coils: nuclei (transmit/ receive), number of channels, type, body part                                                                                                                                                   | 1H, 32 ch, head, Nova Medical                                                                                 |
| e. Additional hardware                                                                                                                                                                                                         | N/A                                                                                                           |
| <b>2. Acquisition</b>                                                                                                                                                                                                          |                                                                                                               |
| a. Pulse sequence                                                                                                                                                                                                              | FID-MRSI                                                                                                      |
| b. Volume of interest (VOI) locations                                                                                                                                                                                          | Tumor, peritumoral, NAWM                                                                                      |
| c. Nominal VOI size                                                                                                                                                                                                            | 220×220×110 mm <sup>3</sup>                                                                                   |
| d. Repetition time (TR), echo time (TE)                                                                                                                                                                                        | 450 ms / 1.3 ms acquisition delay                                                                             |
| e. Total number of excitations or acquisitions per spectrum                                                                                                                                                                    | N/A, spatial-spectral encoding                                                                                |
| In-time series for kinetic studies                                                                                                                                                                                             | N/A                                                                                                           |
| i. Number of averaged spectra (NA) per time-point                                                                                                                                                                              | N/A                                                                                                           |
| ii. Averaging method (e.g., block-wise or moving average)                                                                                                                                                                      | N/A                                                                                                           |
| iii. Total number of spectra (acquired / in-time series)                                                                                                                                                                       | N/A                                                                                                           |
| f. Additional sequence parameters (spectral width in Hz, number of spectral points, frequency offsets); If STEAM: Mixing Time TM; If MRSI: 2D or 3D, FOV in all directions, matrix size, acceleration factors, sampling method | BW 2778 Hz, 1920 spectral points, MRSI: 3D, 220×220×133 mm <sup>3</sup> , 64×64×39, spatial-spectral encoding |
| g. Water suppression method                                                                                                                                                                                                    | WET                                                                                                           |
| h. Shimming method, reference peak, and thresholds for “acceptance of shim” chosen                                                                                                                                             | Standard shim + manual adjustment, water peak < 50 Hz                                                         |
| i. Triggering or motion correction method                                                                                                                                                                                      | N/A                                                                                                           |
| <b>3. Data analysis methods and outputs</b>                                                                                                                                                                                    |                                                                                                               |
| a. Analysis software                                                                                                                                                                                                           | LCModel 6.3-1                                                                                                 |
| b. Processing steps deviating from quoted reference or product                                                                                                                                                                 | N/A                                                                                                           |
| c. Output measure                                                                                                                                                                                                              | Ratio                                                                                                         |
| d. Quantification references and assumptions, fitting model assumptions                                                                                                                                                        | Simulated in NMRScope-B, macromolecular background                                                            |
| <b>4. Data Quality</b>                                                                                                                                                                                                         |                                                                                                               |
| a. Reported variables (SNR, linewidth (with ref.                                                                                                                                                                               | SNR and linewidths not reported                                                                               |

**A Comparison of 7T MRSI and 3T MRF for Tumor Localization in Glioma Patients**  
*Supplementary Material*

|                                                             |                                                                                 |
|-------------------------------------------------------------|---------------------------------------------------------------------------------|
| peaks))                                                     |                                                                                 |
| <b>b. Data exclusion criteria</b>                           | tCr SNR <5; tCr FWHM >0.15 ppm; metabolite Cramér-Rao lower bounds (CRLB) >40 % |
| <b>c. Quality measures of post processing model fitting</b> | CRLB                                                                            |
| <b>d. Sample spectrum</b>                                   | See Supp. Fig. 4                                                                |

**A Comparison of 7T MRSI and 3T MRF for Tumor Localization in Glioma Patients**  
*Supplementary Material*

**Table S3.** MRF sequence parameters.

| MRF Sequence Parameters    |                           |
|----------------------------|---------------------------|
| <b>Voxel Dimensions</b>    | 1.0 × 1.0 mm <sup>2</sup> |
| <b>Matrix Size</b>         | 256 × 256                 |
| <b>Field of View</b>       | 256 × 256 mm <sup>2</sup> |
| <b>Number of Slices</b>    | 10–13                     |
| <b>Slice Thickness</b>     | 5 mm                      |
| <b>TE</b>                  | 2 ms                      |
| <b>TI</b>                  | 21 ms                     |
| <b>TR</b>                  | 12.14–15.00 ms            |
| <b>TA</b>                  | 3:51–4:51 (min:sec)       |
| <b>Acceleration Factor</b> | 24 (inner k-space)        |
|                            | 48 (outer k-space)        |
| <b>RX Bandwidth</b>        | 400 kHz                   |
| <b>FA</b>                  | 0–74°                     |
| <b>Fat Saturation</b>      | no                        |

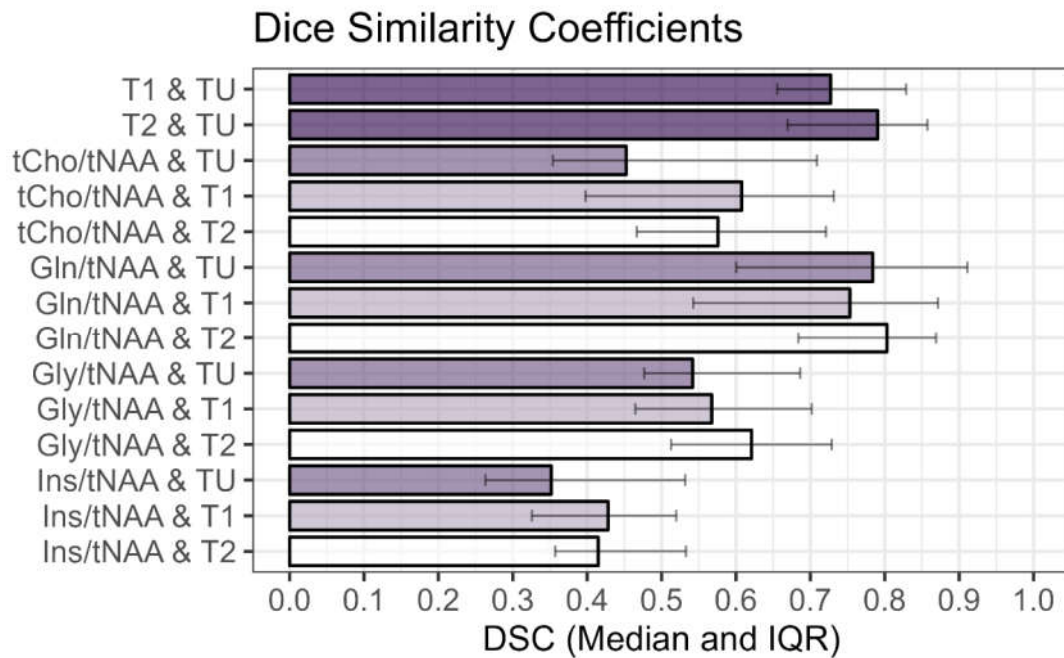

**Figure S1.** Sørensen-Dice Similarity Coefficients (DSCs) in the tumor segmentation between the segmentation (TU), the MRF's relaxation time hotspots (T1, T2), and MRSI's metabolite ratios (tCho/tNAA, Gln/tNAA, Gly/tNAA, Ins/tNAA). Gln/tNAA had the highest correspondence with the tumor segmentation and T1 and T2 hotspots.

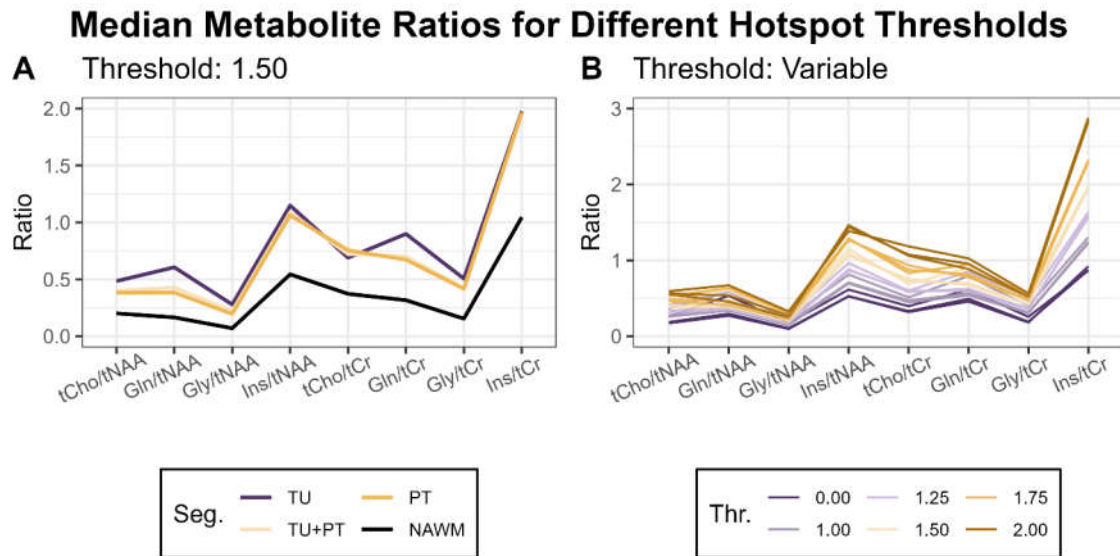

**Figure S2. A:** Metabolite ratios tCho/tNAA, Gln/tNAA, Gly/tNAA, and Ins/tNAA, as well as tCho/tCr, Gln/tCr, Gly/tCr, and Ins/tCr, for a hotspot threshold of 1.5, plotted separately for the tumor segmentation (TU), the tumor region and the peritumoral region (TU+PT), the peritumoral region alone (PT), and the normal-appearing white matter control region

**A Comparison of 7T MRSI and 3T MRF for Tumor Localization in Glioma Patients**  
*Supplementary Material*

(NAWM). **B**: The same metabolite ratios for different hotspot thresholds, with one line each for TU, TU+PT, and PT.

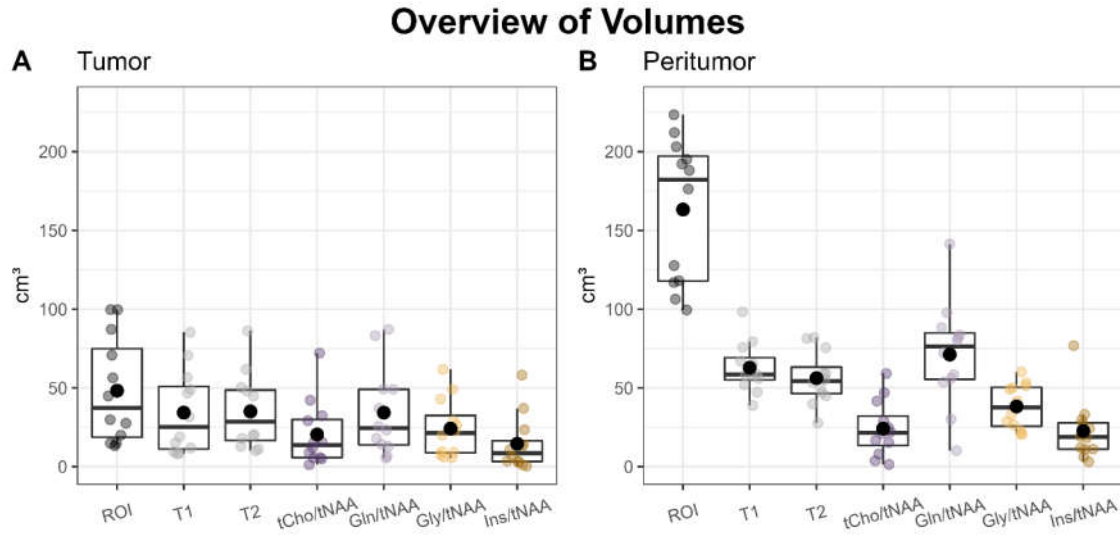

**Figure S3.** Overview of the volumes of the region of interest (ROI), the MRF hotspots (T1, T2), and the MRSI hotspots (tCho/tNAA, Gln/tNAA, Gly/tNAA, Ins/tNAA), in the tumor (**A**) and the peritumoral region (**B**).

## Example Spectra of Patient 10

Female, 28, Grade 3 Anaplastic Astrocytoma

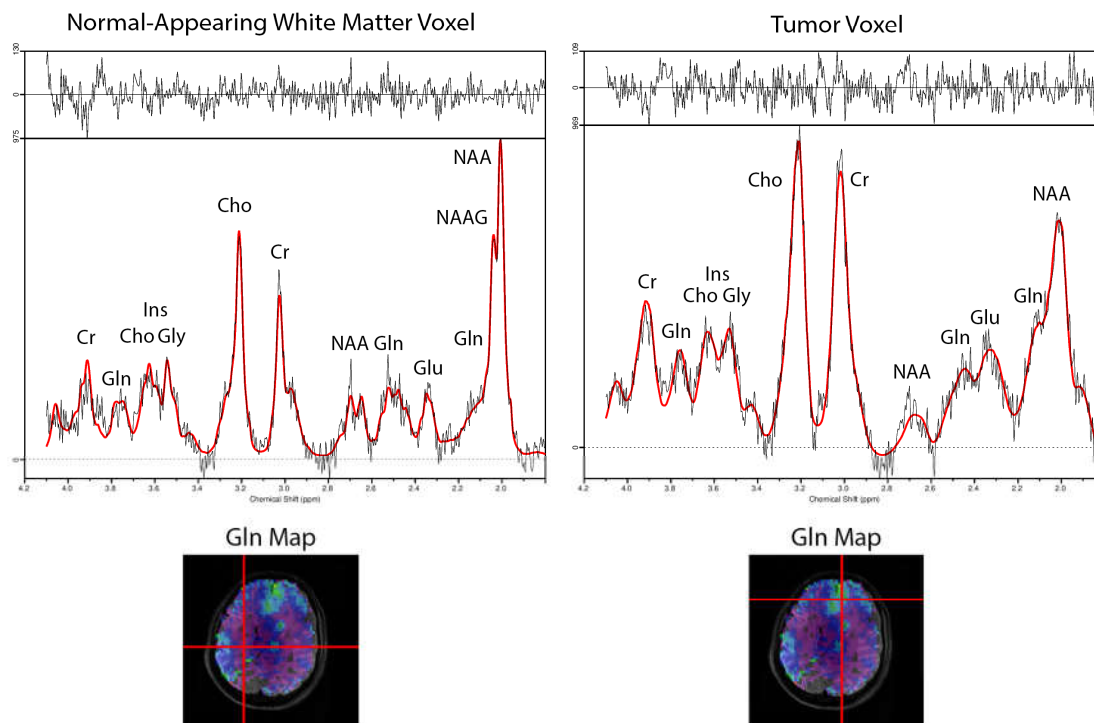

**Figure S4.** Example spectra of patient 10 (anaplastic astrocytoma, grade 3, female, 28 years of age). Normal appearing white matter spectrum (left) and tumor spectrum (right). Below, glutamine (Gln) maps overlaid with a T1w reference image are shown, and the voxel position is indicated.
